# Supplementary material for: Bioengineered mussel glue incorporated with a cell recognition motif as an osteostimulating bone adhesive for titanium implants
Source: Royal Society of Chemistry journal article supplement (doi:10.1039/c5tb01230a), 2015-01-01
Supplement: c5tb01230a1.pdf [file c5tb01230a1.pdf]

## **Electronic Supplementary Information**

# **Bioengineered mussel glue incorporated with a cell recognition motif as an osteostimulating bone adhesive for titanium implants**

*Yun Kee Jo, Bong-Hyuk Choi, Cong Zhou, Jin-Soo Ahn,  
Sang Ho Jun\*, and Hyung Joon Cha\**

**Corresponding Author**

\*E-mail: (H.J.C) [hjcha@postech.ac.kr](mailto:hjcha@postech.ac.kr), (S.H.J) [junsang@korea.ac.kr](mailto:junsang@korea.ac.kr)

**Table S1.** Primers used in the study.<sup>27</sup>

| <b>Marker gene</b> | <b>Primer sequences (5'→3')</b> |                      | <b>Size (bp)</b> | <b>Accession No.</b> |
|--------------------|---------------------------------|----------------------|------------------|----------------------|
| GAPDH              | Forward                         | AGAATTGACAAACGGGACCT | 77               | AY618199             |
|                    | Reverse                         | GGAGGAGCAGAGAGCTTGAC |                  |                      |
| Runx2              | Forward                         | GGGGCAGTCATAACTGGGTT | 115              | NM_009820.5          |
|                    | Reverse                         | GCGTGGGAACAGGTCACTTA |                  |                      |
| BSP                | Forward                         | CGAAGAAGCAGAAGTGGATG | 111              | L20232.1             |
|                    | Reverse                         | GCTTCTTCTCCGTTGTCTCC |                  |                      |
| ALP                | Forward                         | GCCCTCCCGATCCTGACCAA | 103              | XM_006538499.2       |
|                    | Reverse                         | GCAGAGCCTGCTTGGCCTTA |                  |                      |
| OC                 | Forward                         | CACATGAGGGAGACAACAGG | 133              | L24431.1             |
|                    | Reverse                         | GGTGATGGCCAAGACTAAGG |                  |                      |

<sup>27</sup> B. -H. Choi, H. Cheong, J. -S. Ahn, C. Zhou, J. J. Kwon, H. J. Cha and S. H. Jun, *J. Mater. Chem.*, 2015, **3**, 546-555.

**Table S2.** Element composition of bone nodules at 21 days after differentiation of MC3T3-E1 pre-osteoblast cells on the MAP-RGD-coated Ti-mesh surface examined by EDS analysis.

| <b>Element</b>         | <b>C</b> | <b>N</b> | <b>O</b> | <b>Ca</b> | <b>P</b> | <b>Ti</b> |
|------------------------|----------|----------|----------|-----------|----------|-----------|
| <b>Composition (%)</b> | 10.27    | 4.13     | 9.81     | 18.79     | 16.04    | 40.96     |

**Table S3.** EDS analyses for elemental compositions of tested Ti-mesh surfaces.

| <b>Element</b> | <b>NC</b> | <b>MAP</b> | <b>MAP-RGD</b> |
|----------------|-----------|------------|----------------|
| C (%)          | -         | 53.64      | 49.97          |
| N (%)          | -         | 21.21      | 23.08          |
| O (%)          | -         | 25.15      | 26.95          |
| Ti (%)         | 100.00    | -          | -              |

Abbreviation: NC, bare Ti-mesh surface; MAP, MAP-coated Ti-mesh surface; MAP-RGD, MAP-RGD-coated Ti-mesh surface.

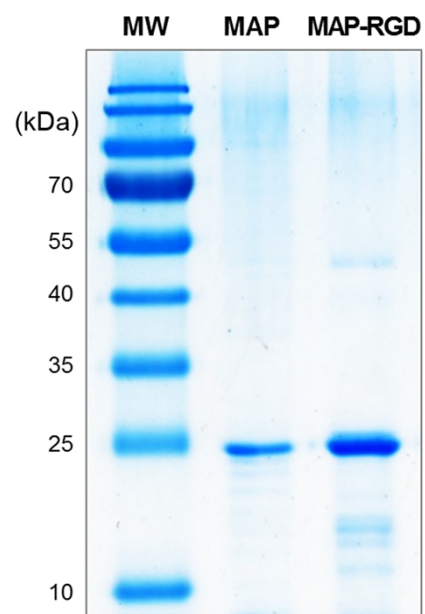

**Figure S1.** SDS-PAGE analysis of purified MAP and MAP-RGD.

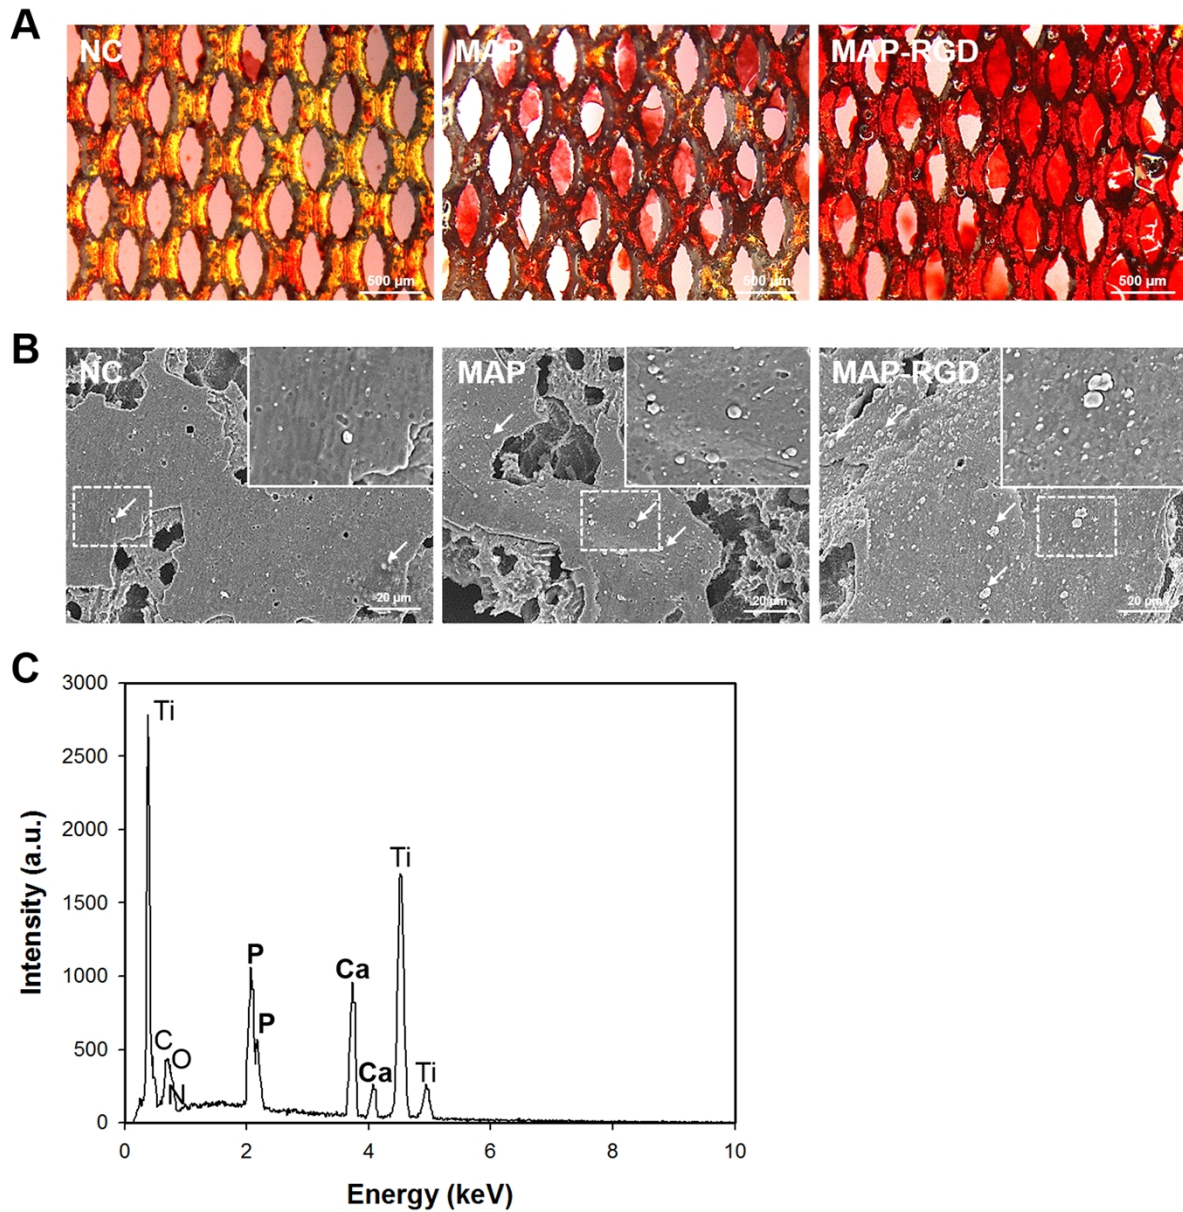

**Figure S2.** *In vitro* osteogenic differentiation of MC3T3-E1 pre-osteoblast cells on tested Ti-mesh surfaces. Matrix mineralization observed with (A) Alizarin red S staining and (B) FE-SEM micrographs, and (C) element composition of bone nodules examined by EDS analysis at 21 days after differentiation. Arrows in (B) indicate mineralized deposits. Abbreviations: NC, bare Ti-mesh surface; MAP, MAP-coated Ti-mesh surface; MAP-RGD, MAP-RGD-coated Ti-mesh surface.

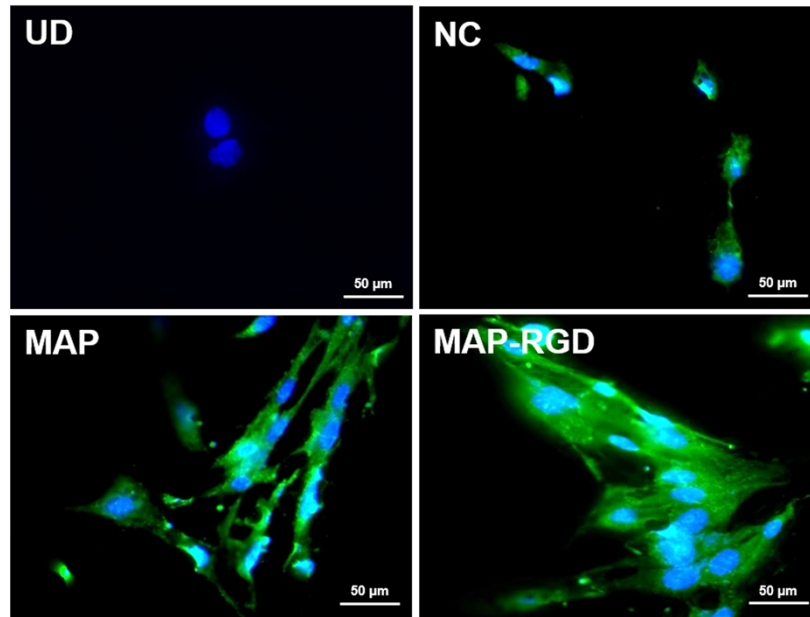

**Figure S3.** OC immunofluorescence staining at 15 days after differentiation. OC stained with FITC are appeared in green and nuclei stained with DAPI are blue. Abbreviations: UD, undifferentiated cells; NC, bare Ti-mesh surface; MAP, MAP-coated Ti-mesh surface; MAP-RGD, MAP-RGD-coated Ti-mesh surface.

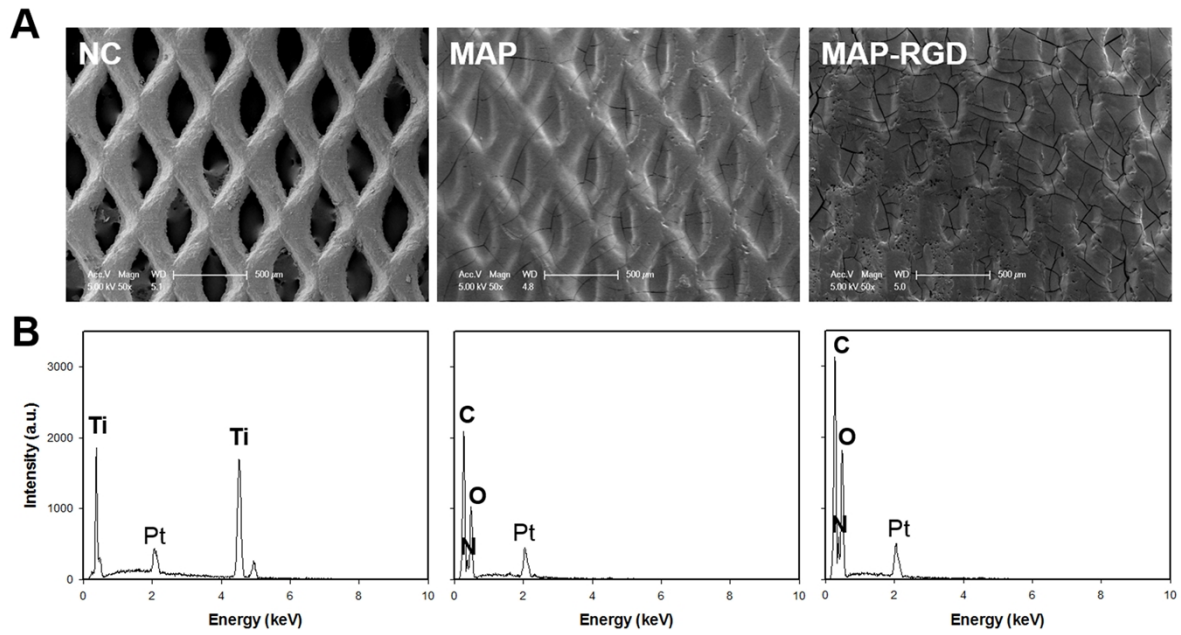

**Figure S4.** Surface properties of tested Ti-mesh surfaces. (A) Surface morphology examined by FE-SEM. (B) Elemental composition examined by EDS analysis. Abbreviation: NC, bare Ti-mesh surface; MAP, MAP-coated Ti-mesh surface; MAP-RGD, MAP-RGD-coated Ti-mesh surface.



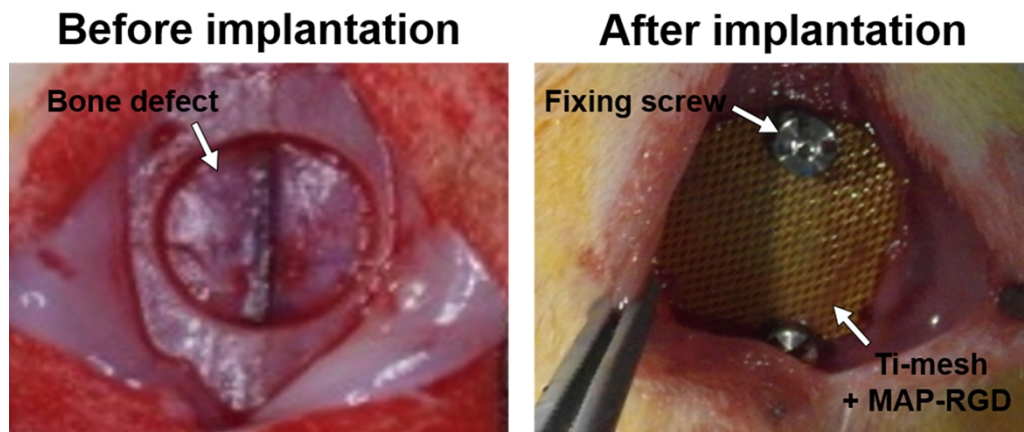

**Figure S5.** Creation of a calvarial defect site (left) and application of MAP-RGD-coated Ti-mesh surface with fixing screw (right) for *in vivo* animal surgery.
